# Supplementary material for: Low Nephron Number Induced by Maternal Protein Restriction Is Prevented by Nicotinamide Riboside Supplementation Depending on Sirtuin 3 Activation
Source: MDPI journal article supplement (doi:10.3390/cells11203316), 2022-10-21
Supplement: s1 [file s1]

## Uncropped gels in Figure 1b

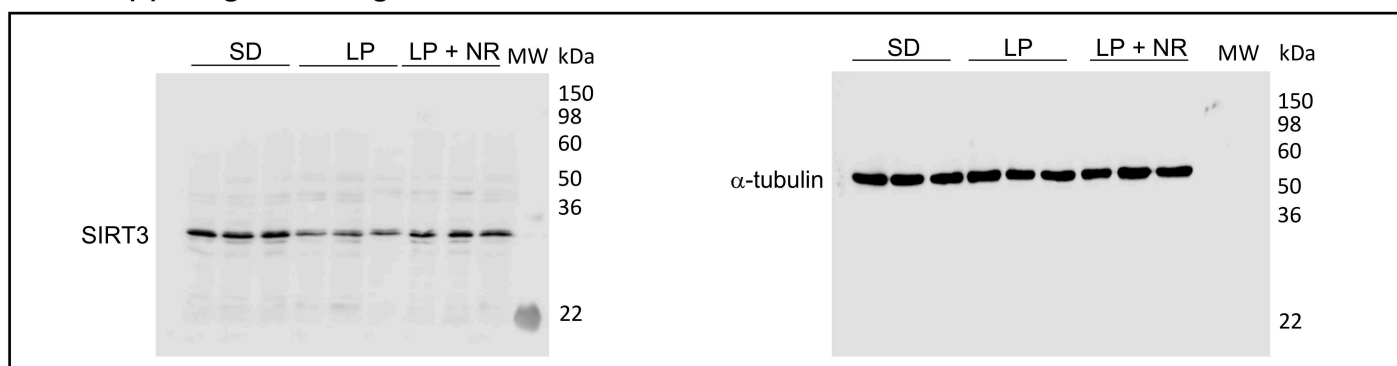

## Uncropped gels in Figure 4a

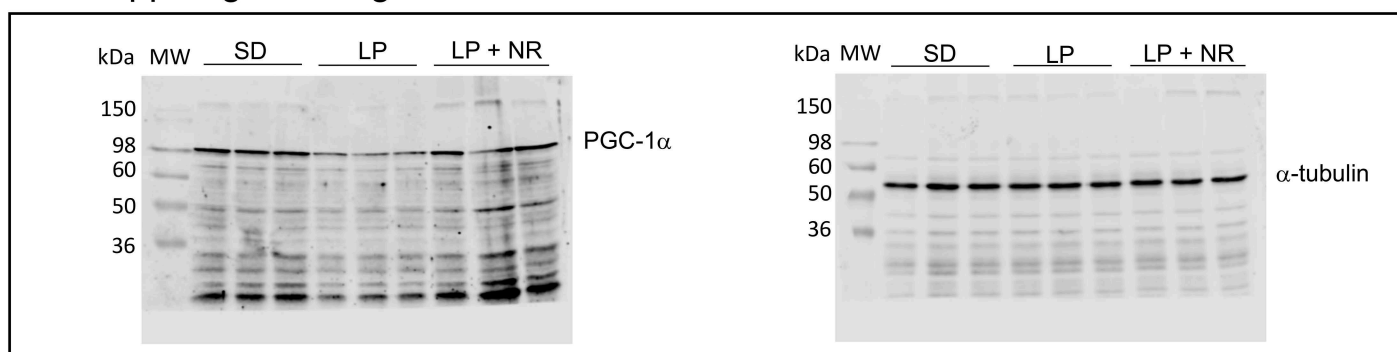

## Uncropped gels in Figure 4b

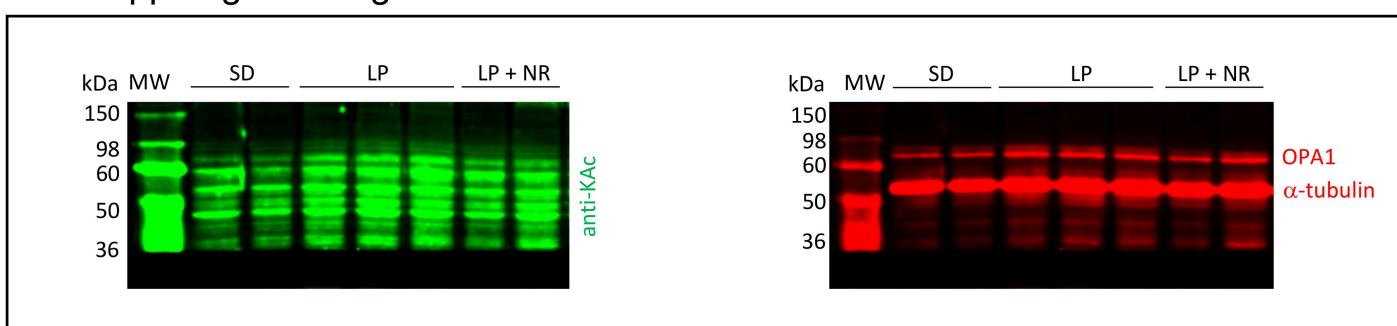

## Uncropped gels in Figure 5a

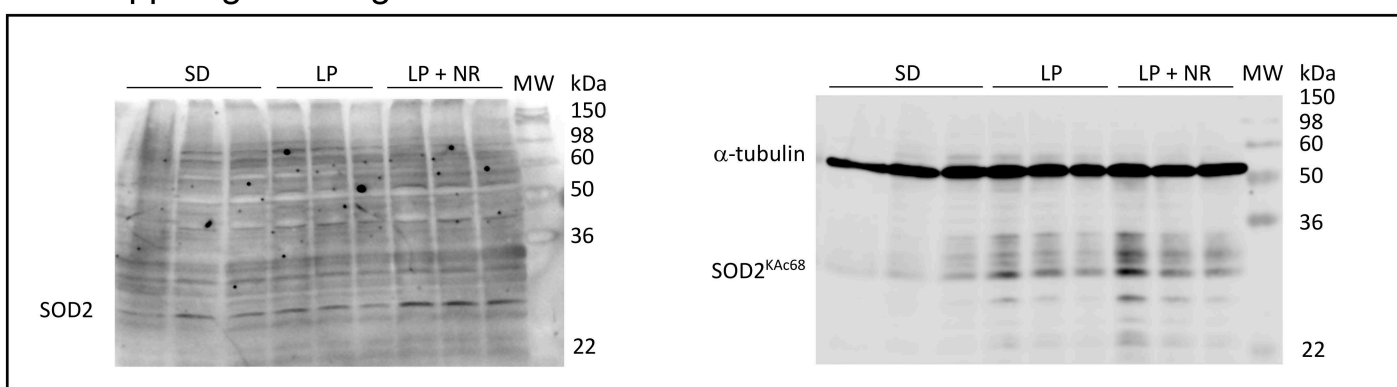

**Figure S1.** Uncropped gels of representative Western Blots reported the main figures. SD, standard diet; LP, low protein diet; NR, nicotinamide riboside; MW, molecular weight; kDa, kilo Dalton; SIRT3, sirtuin 3; PGC-1α, proliferator-activated receptor γ (PPARγ) coactivator-1α; KAc, lysine acetylation; OPA1, optic atrophy 1; SOD2, superoxide dismutase 2; SOD2<sup>KAc68</sup>, superoxide dismutase 2 acetylated at lysine 68.
